# Supplementary material for: Long-term Evaluation of Commercial Air Quality Sensors: An Overview from the QUANT Study
Source: Copernicus journal article supplement (doi:10.5194/amt-2023-251), 2023-12-13
Supplement: Supplementary file 1 [file amt-2023-251-supplement.pdf]

## 1 **S1. QUANT main study devices**

2 In this section, a brief description of the QUANT main study systems' components is offered.

3 PurpleAir (PA) (<https://www2.purpleair.com>) devices (PA-II-SD model, firmware v4.11) reports particulate  
4 matter (PM<sub>1</sub>, PM<sub>2.5</sub>, and PM<sub>10</sub>), and it was chosen for its penetration around the world. Two identical Plantower  
5 PMS5003 (Plantower) sensors (channels A and B) are found in each PA. It offers two data products (2-min avg.  
6 time): the “cf\_atm” (for outdoor applications) and the “cf\_1” (for indoor or controlled environment applications).  
7 The PMS behaves like a nephelometer rather than an optical particle counter to measure the light scattered by the  
8 PM (Ouimette et al., 2022) and is composed of a laser, a photodiode, a fan, and a microprocessor control unit.  
9 They also measure temperature (Temp), relative humidity (RH), and atmospheric pressure (Pres) (Bosch). The  
10 data can be communicated via Wi-Fi or stored locally (microSD card), which was the preferred way during the  
11 colocation. No calibrated products are offered by the company.

12 AQMesh (<https://www.aqmesh.com>) reports NO<sub>2</sub>, NO, O<sub>3</sub> using electrochemical (EC) sensors (Alphasense), CO<sub>2</sub>  
13 with a non-dispersive infrared sensor (NDIR, Alphasense), PM<sub>1</sub>, PM<sub>2.5</sub>, and PM<sub>10</sub> through a light-scattering sensor  
14 (Nephelometer, Environmental Instr.) with 1-minute time resolution (algorithm v5.1 for gases and v3.0 for PM).  
15 This instrument also registers Temp, RH, and Pres (Solid-State sensors) (Zauli-Sajani et al., 2022) and the  
16 sampling mechanism employs a pump. The collected data is sent to the company server via a cellular network and  
17 post-processed (Temp, RH, and cross-interference correction) in the cloud by a proprietary algorithm. Finally, the  
18 data is released to the final user via secure web login or through its Application Programming Interface (API).  
19 Although the first 4 months of the deployment the data had a 15-min resolution, since then the provided resolution  
20 is 1-min average.

21 AQY (v.1.0) is also a multi-species device (<https://www.aeroqual.com>) and measures O<sub>3</sub>, NO<sub>2</sub>, PM<sub>2.5</sub>, PM<sub>10</sub>,  
22 Temp, and RH. This is the only device system that does not use Alphasense sensors for gases. While O<sub>3</sub> is  
23 quantified using a metal oxide sensor (WO<sub>3</sub>-based, Aeroqual Ltd), the NO<sub>2</sub> is measured by an EC sensor  
24 (Membrapore type O<sub>3</sub>/M5, Aeroqual Ltd) (Weissert et al., 2019). For PM it uses a light scattering method (Nova)  
25 to convert size and particle count to a mass fraction and behaves like a nephelometer (Myklebust et al., 2022).  
26 These LCS devices send their data (1-min time resolution) to the Aeroqual server via cellular (WiFi could also be  
27 used for this purpose) or stored locally (microSD card). The non-local data access is through a web portal or via  
28 API.

29 Zephyr units (<https://www.earthsense.co.uk>) measure PM (Nephelometer, Plantower), Temp & RH (Sensirion),  
30 and Press (Bosch) (the sample uptake uses a fan). As most of the commercial units tested here, it used Alphasense  
31 EC sensors (the “A series”, a smaller version than the B series) for gases (NO, NO<sub>2</sub>, and O<sub>3</sub>). These devices send  
32 their raw data to the server via a cellular network, where they pre-process the raw signals. We have secure access  
33 to the measurements with a time resolution of 1-min per species through the website or via its API.

34 ARIsense v200 devices (<https://quant-aq.com>) measure NO, NO<sub>2</sub>, O<sub>3</sub>, CO (EC, Alphasense), CO<sub>2</sub> (NDIR,  
35 Alphasense), Temp & RH (Sensirion), and Press (Bosch) (Cross et al., 2017). Of all the devices tested, this is the  
36 only one that uses an Optical Particle Counter (OPC) for PM (Particles Plus). Communication is carried out  
37 through a cellular network and the data products are accessed through a web portal or API (1-minute time

38 resolution). According to the company policy, only the gas data products are subjected to calibrations (if  
39 colocation data is available).

## 40 **S2. WPS devices**

41 A short description of the WPS devices' components is shown in this section

42 Modulair-PM instruments (<https://quant-aq.com>) employ two different techniques to obtain PM mass  
43 concentration (it samples the air using a fan), an OPC (Alphasense, OPC-N3) and a nephelometer (Plantower,  
44 PMS5003). This system provides 1-min time resolution data for PM<sub>1</sub>, PM<sub>2.5</sub>, and PM<sub>10</sub>, plus size-resolved particle  
45 number concentration (range 350 nm to 40 µm) (Meyer et al., 2022; Westgate & Ng, 2022). Temp, RH, and Press  
46 are also measured, but no data was found about the sensing elements it uses. The post-processed data can be  
47 accessed locally (microSD card) or through its server (cellular network comm) via its web portal or API.

48 AQMesh (see earlier description).

49 The Atmos device (<http://urbansciences.in/>) reports PM<sub>1</sub>, PM<sub>2.5</sub>, PM<sub>10</sub> (Plantower, PMS7003) plus Temp and RH  
50 (Adafruit), employing a fan as a means to sample the air. The system transmits the data (1-min time resolution)  
51 to a cloud server (only via Wi-Fi) and also stores it locally (Puttaswamy et al., 2022). The data can be accessed  
52 via a web dashboard or API. Unfortunately, and due to the meteorological conditions at the Manchester supersite  
53 these co-located devices only survived for about 2 months.

54 The IMB instrument (<https://www.bosch-mobility-solutions.com>) measures NO<sub>2</sub>, O<sub>3</sub>, PM<sub>2.5</sub> and PM<sub>10</sub>,  
55 (Alphasense sensors), plus Press, RH y Temp (no details were found about the type/brand/model). The raw data  
56 is transmitted to their cloud using cellular connectivity (3G or LTE). The final data is 1-min resolution (accessed  
57 only via API).

58 Polludrone (<https://oizom.com>) uses Alphasense sensors for gas measurements (B4 series for NO, NO<sub>2</sub>, O<sub>3</sub>. No  
59 data available about CO, CO<sub>2</sub> and SO<sub>2</sub>) and a Wuhan Cubic PM3006S for PM (PM<sub>2.5</sub> and PM<sub>10</sub>)(*Oizom -*  
60 *Polludrone Smart*, n.d.). It also registers RH and Temp, but no data was found in regards to sensor model/brand.  
61 The sampling mechanism uses a fan and data transmission is wireless. The final product (time res is 10-min) can  
62 be obtained through the Oizom webpage and/or via API.

63 Kunak Air Pro (<https://www.kunak.es/>) uses a fan for sampling and all sensors are from Alphasense (EC, B series  
64 for CO, NO, NO<sub>2</sub> and O<sub>3</sub>; an NDIR sensor for CO<sub>2</sub>; and an OPC-N3 for PM<sub>1</sub>, PM<sub>2.5</sub>, and PM<sub>10</sub>) (Hofman et al.,  
65 2022). It also provides Temp, RH, and Press (no data was found in regards to environmental sensor model/brand).  
66 The raw data is transmitted via a multi-band network, and the final data (time res is 5-min) can be accessed through  
67 their website or via API.

68 The Silax Air (<https://vortexiot.com>) system measures NO<sub>2</sub>, O<sub>3</sub>, PM<sub>10</sub> and PM<sub>2.5</sub>. Their webpage mentions that for  
69 PM an optical scattering sensor is used and EC sensors for the gases. Further details weren't found. The raw data  
70 is transmitted via 4G or WiFi and the final user accesses the final product (5-min time res) through API or website.

71

72 The Node-S system (<https://www.clarity.io>) holds a nephelometer (Plantower PMS6003) to measure 3 PM size  
73 cuts (PM<sub>1</sub>, PM<sub>2.5</sub>, PM<sub>10</sub>) (Liu et al., 2022) and EC sensors for NO<sub>2</sub> (Alphasense) (Miech et al., 2021). The air is  
74 dragged into the system by a fan and a Bosch sensor is used for press, RH, and temp. The data is communicated  
75 to Clarity's cloud via cellular signal (4G) and the final product is ~3-min time res (something unusual for sensor  
76 systems). Access to the final data is via the web portal or through API.

77 Praxis/Urban (<https://www.southcoastscience.com>) system employs EC sensors for NO, NO<sub>2</sub>, O<sub>3</sub> (Alphasense, A  
78 series), an NDIR for CO<sub>2</sub> (Alphasense), and particle counter (Alphasense, OPC-N3) for PM<sub>1</sub>, PM<sub>10</sub> and PM<sub>2.5</sub>.  
79 The Temp/RH is Sensirion and the Press sensor is TDK. The raw data is communicated to the company server  
80 using 4G and the user can access it and post-processed data through an API (1-min time res).

### 81 **S3. Co-location sites**

82 For the main QUANT deployment, 3 field sites were chosen: Manchester, London, and York, all providing  
83 extensive reference measurements across a range of chemical environments representative of UK urban  
84 atmospheres. On the other hand, only the Manchester site was used for the WPS colocation.

85 The Manchester Air Quality Supersite (MAQS, 53° 26' 39.2"N, 2° 12' 51.9"W) is one of the largest air quality  
86 research facilities in the UK, and also because it is located in the south of the city of Manchester (the second  
87 largest metropolitan area in the UK, with approx. 3.3 million inh.) in an urban background environment (avg.  
88 temp. in winter of about 4-5 °C and RH ~87 %, avg. temp. in summer around 16-17 °C and RH ~88 %. MAQS  
89 reference instrumentation details can be found in the Section S4. All the data provided by MAQS was 1-min time  
90 resolution.

91 The London Air Quality Supersite (LAQS) is an urban background monitoring site located at Honor Oak Park  
92 (51° 26' 58.9"N 0° 02' 14.6"W) in Greater London, the third biggest European urban conglomeration with approx.  
93 14.8 million inh. (avg. temp. in winter ~5 °C and RH ~84 %, avg. temp. in summer ~17 °C and RH ~72 %). All  
94 gas data provided by LAQS is 1-min time resolution and 15-min for PM.

95 The York Fishergate roadside site (YoFi), located in the city of York (~210,000 inh., avg. temp. in winter of ~4  
96 °C and RH ~87 %, avg. temp. in summer around 15 °C and RH ~80 %). This site is a self-contained air quality  
97 monitoring station located very close to the city centre on a traffic island (53° 57' 06.9"N 1° 04' 33.1"W)  
98 surrounded by a residential/commercial area. This site was chosen to evaluate the LCS responses to a greater  
99 pollutant variability typical of traffic-related sites (in contrast with urban background monitoring stations as in the  
100 case of MAQS and LAQS). While PM and NO<sub>x</sub> data from YoFi are 1-hr time resolution, the O<sub>3</sub> data is 1-min  
101 (deployed on the 15th of May 2020, specifically as part of the QUANT study).

### 102 **S4. Reference instrumentation, QA/QC, and data-sharing periods**

103 Table S1 summarises the reference instrumentation at each site, Table S2 describes some of the QA/QC processes  
104 at the supersites, and Table 3 shows the data periods shared with the suppliers.

105 **Table S1. Research grade instrumentation used for the QUANT study.**

| Analyte         | Manchester                | London                    | York                         |
|-----------------|---------------------------|---------------------------|------------------------------|
| NO              | Thermo 42i-y<br>(Chem)    | Teledyne T200U<br>(Chem)  | Teledyne T200UP<br>(Chem)    |
| NO <sub>2</sub> | *Teledyne T500U<br>(CAPS) | *Teledyne T500U<br>(CAPS) |                              |
| O <sub>3</sub>  | *Thermo 49i<br>(UV)       | *Teledyne 400E<br>(UV)    | *2B 205<br>(UV)              |
| PM              | *Palas FIDAS200<br>(OAS)  | *Palas FIDAS200<br>(OAS)  | *Met One BAM<br>1020<br>(BA) |

106 \*Equivalent to reference

107 Acronyms: Chem: Chemiluminescence; CAPS: Cavity Attenuated Phase Shift Spectroscopy; UV: Ultraviolet; OAS:

108 Optical aerosol spectrometer; BA: Beta attenuation.

109 **Table S2. Summary of Quality Assurance processes in MAQS and LAQS**

| Instrument                          | Frequency                   | *Process                                                                                                                     |
|-------------------------------------|-----------------------------|------------------------------------------------------------------------------------------------------------------------------|
| NO <sub>y</sub>                     | At least monthly            | Zero and span checks using standard cylinder and scrubber. Corrections to zero and span values.                              |
| NO <sub>2</sub>                     | Daily                       | Automatic zero and span checks using internal NO <sub>2</sub> diffusion tube and scrubber. Zero corrections, span monitored. |
| O <sub>3</sub>                      | Daily                       | Automatic zero and span checks using internal O <sub>3</sub> lamp and scrubber. Corrections to zero, span monitored.         |
| CO                                  | Every three hours & monthly | Zero checks every three hours and span checks monthly using onsite cylinder. Adjustments to zero and span values.            |
| CO <sub>2</sub> and CH <sub>4</sub> | Regular                     | Stability checks using onsite cylinder, no corrections made.                                                                 |
| *PM                                 | Semiannual                  | Sizing response verified with Mono dust, flow rate checked with Gilibrator.                                                  |

110 \*Checked with external standards by NPL every 6 months. These external standards are also used to provide a certification of the on-site  
111 standard cylinders. Final corrections to the data are provided by using the audit data to define the concentration of the on-site standards, with  
112 zero and span values interpolated between the calibration points.

113 \*\*Sizing and flow checked every 6-month NPL audit process.1

114 **Table S3. Reference data is shared with the sensor manufacturers.**

| Reference dataset | QUANT main study        |            | Reference dataset | Wider Participation Study |            |
|-------------------|-------------------------|------------|-------------------|---------------------------|------------|
|                   | Period                  | Released   |                   | Period                    | Released   |
| 1                 | 10-12-2019 - 17-02-2020 | 15-04-2020 | 1                 | 17-06-2021 - 16-07-2021   | 23-07-2021 |
| 2                 | 18-02-2020 - 17-08-2020 | 27-10-2020 | 2                 | 01-12-2021 - 31-12-2021   | 26-01-2022 |

115 **S5. Data products**

116 Figures S1 and S2 summarise data products crafted during QUANT and the WPS according to the company.

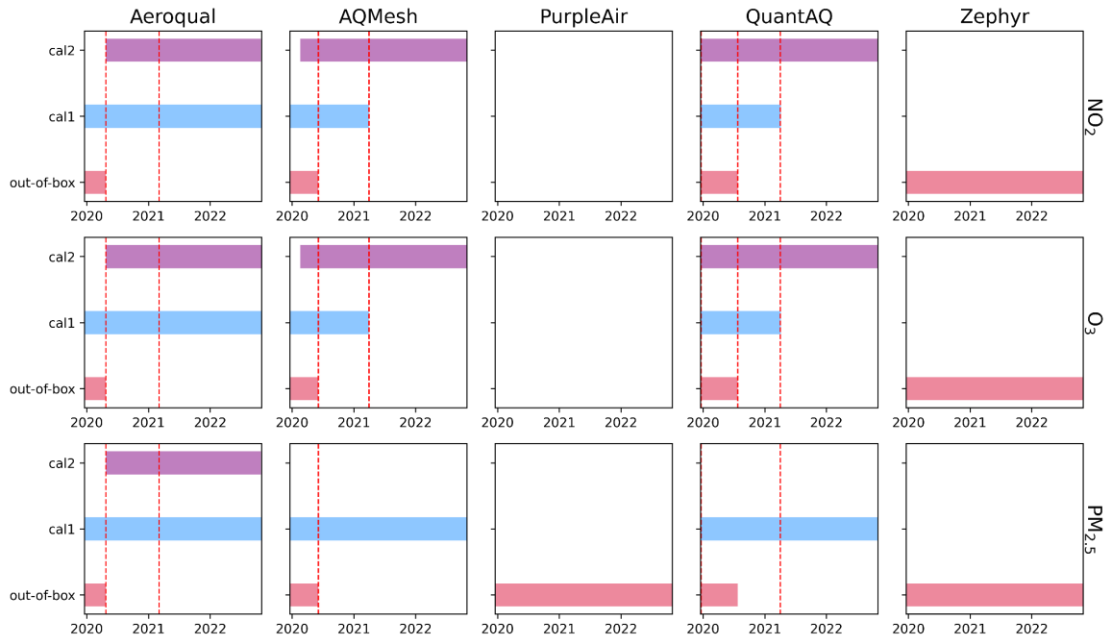

117

118 **Figure S1. Data product for each of the participating companies during Main QUANT. The top panels are for NO<sub>2</sub>,**  
 119 **the middle panels for O<sub>3</sub> and the bottom panels for PM<sub>2.5</sub>. The y-axis represents the different products: “out-of-**  
 120 **box”, cal1 and cal2. The x-axis shows the dates for which each company provided the mentioned products.**

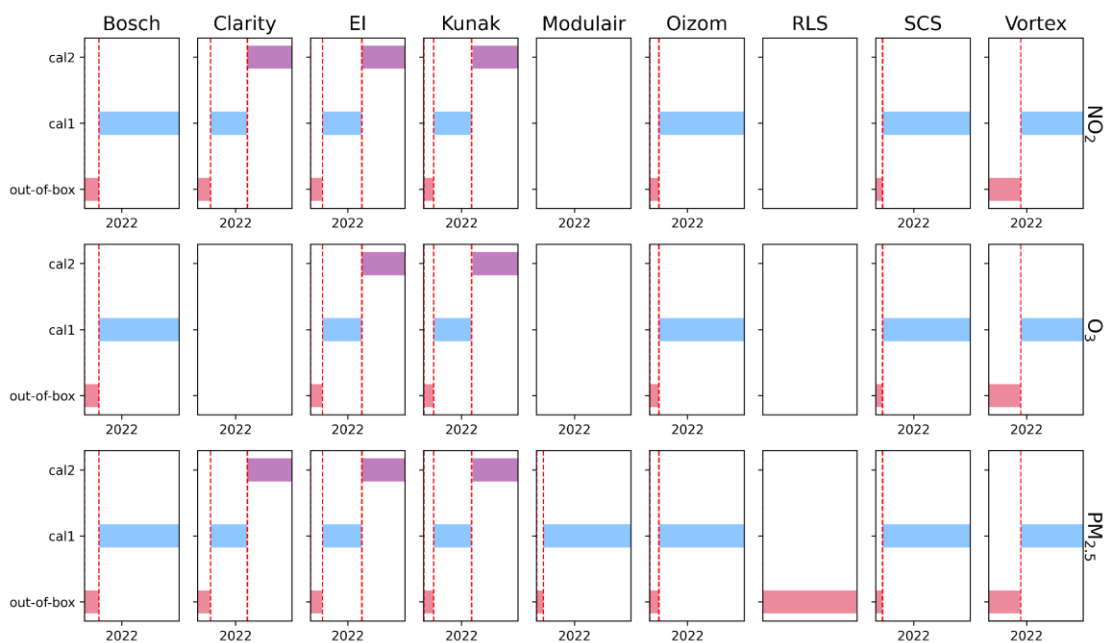

121

122 Figure S2. Data product for each of the participating companies in the WPS. The top panels are for NO<sub>2</sub>, the middle  
123 panels for O<sub>3</sub> and the bottom panels for PM<sub>2.5</sub>. The y-axis represents the different products: “out-of-box”, call1 and  
124 cal2. The x-axis shows the dates for which each company provided the mentioned products.

125 S5. Sensor performance estimated using different reference methods

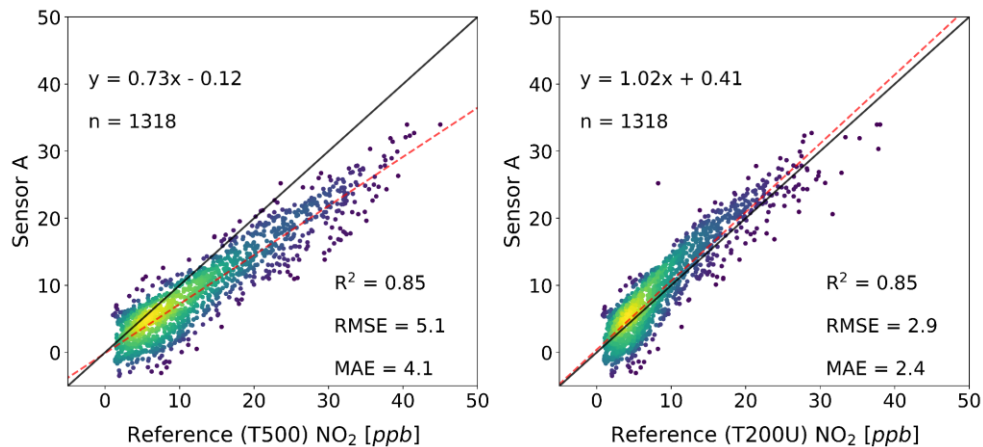

127 Figure S3. Comparative analysis of “Sensor A” performance against two reference instruments for NO<sub>2</sub>  
128 measurements. The left plot shows the correlation with the Teledyne T500 (Cavity Attenuated Phase Shift  
129 Spectroscopy), while the right plot is against the Teledyne T200U (chemiluminescence) and specifically installed at  
130 the Manchester supersite for the QUANT study. The dashed red line represents the line of best fit for the sensor  
131 data against each reference, indicating a closer agreement with the T200U (slope=1.02) compared to the T500  
132 (slope=0.73).

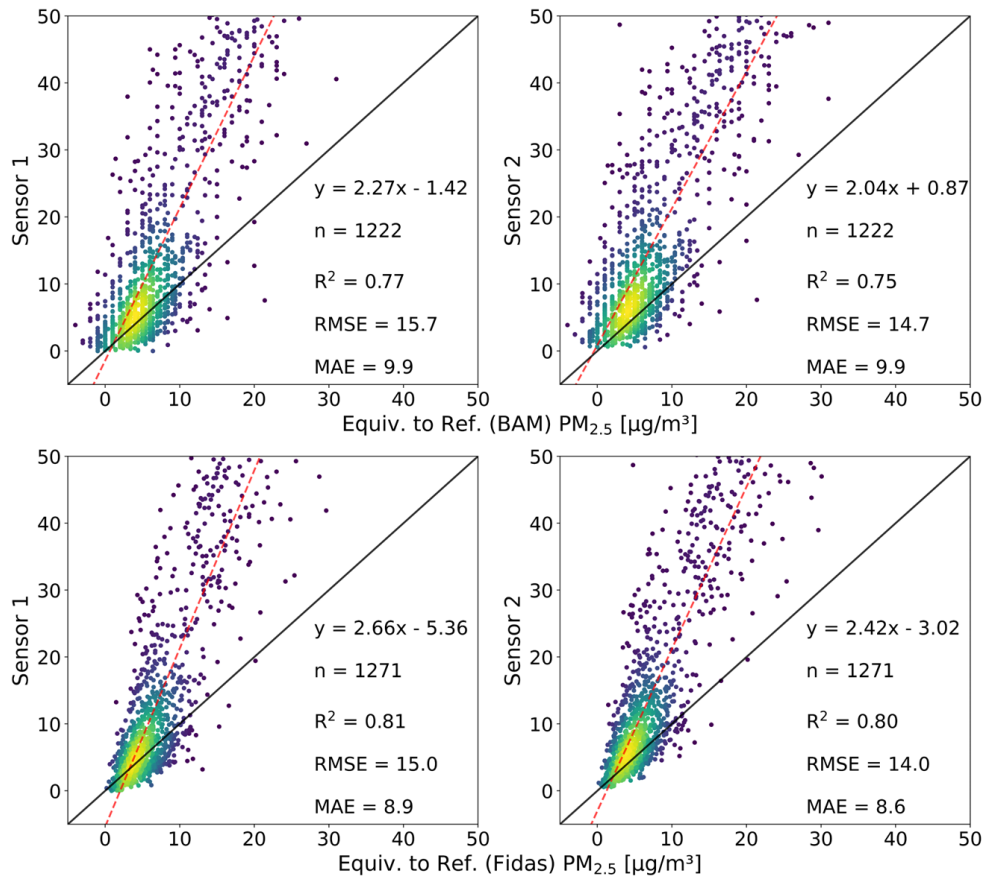

133

134 **Figure S4. Comparative regression analysis and performance metrics of two distinct PM<sub>2.5</sub> sensor systems**  
 135 **benchmarked against a BAM for the top plots and a Fidas for the bottom plots. Each plot demonstrates the**  
 136 **correlation and agreement between the sensor readings and the two equivalent-to-reference instruments in a**  
 137 **roadside site located in York.**

138 **S6. NO<sub>2</sub> Diffusion tubes**

139 A diffusion tube co-location study was carried out between November 2020 and November 2021 at the MAQS,  
 140 LAQS and York sites, using two types of diffusion tubes: the conventional (also known as LAQM, for Local Air  
 141 Quality Management) and UUNN (for UK Urban NO<sub>2</sub> Network). LAQM tubes have an open end and capture  
 142 NO<sub>2</sub> which is converted to nitrite when reacting with triethanolamine (TEA) for subsequent analysis. On the other  
 143 hand, UUNN tubes, similar in the sampling process to LAQM, include an amorphous polyethylene filter at the  
 144 open end to further mitigate the effect of wind on NO<sub>2</sub> measurements. For more details refer to (Butterfield et al.,  
 145 2021). Both types of tubes (conventional and UUNN) were installed in duplicates, either in shelters (to limit the  
 146 incidence of wind) or directly exposed without protection in mounting blocks. Figure S5 illustrate the performance  
 147 comparison of traditional diffusion tubes and a sensor system in Manchester. The data from these diffusion tubes  
 148 have been used to correct the sensor shown here and explained in detail in Section 3.6 (Figures 9b and 9c).

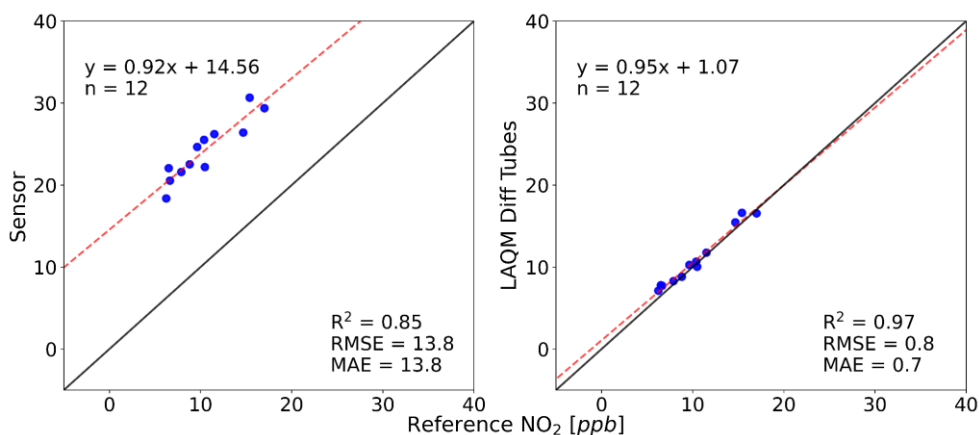

149

150 **Figure S5.** The left plot displays the correlation between an air quality sensor's readings and those from a reference  
 151 monitor for NO<sub>2</sub>, while the right plot demonstrates the LAQM diffusion tube performance. The LAQM plot shows  
 152 a tighter correlation with the 1:1 line, indicating a higher accuracy in measuring NO<sub>2</sub> concentrations for the period  
 153 Nov 2020 - Nov 2021 at the Manchester supersite (blue dots represent monthly averages).

154 **References**

155 Butterfield, D., Martin, N. A., Coppin, G., & Fryer, D. E. (2021). Equivalence of UK nitrogen dioxide diffusion  
 156 tube data to the EU reference method. *Atmospheric Environment*, 262, 118614.

157 <https://doi.org/10.1016/j.atmosenv.2021.118614>

158 Cross, E. S., Williams, L. R., Lewis, D. K., Magoon, G. R., Onasch, T. B., Kaminsky, M. L., Worsnop, D. R., &  
 159 Jayne, J. T. (2017). Use of electrochemical sensors for measurement of air pollution: Correcting  
 160 interference response and validating measurements. *Atmospheric Measurement Techniques*, 10, 3575–  
 161 3588. <https://doi.org/10.5194/amt-10-3575-2017>

162 Hofman, J., Peters, J., Stroobants, C., Elst, E., Baeyens, B., Van Laer, J., Spruyt, M., Van Essche, W., Delbare,  
 163 E., Roels, B., Cochez, A., Gillijns, E., & Van Poppel, M. (2022). Air Quality Sensor Networks for  
 164 Evidence-Based Policy Making: Best Practices for Actionable Insights. *Atmosphere*, 13(6), Article 6.

165 <https://doi.org/10.3390/atmos13060944>

166 Liu, G., Moore, K., Su, W.-C., Delclos, G. L., Gimeno Ruiz de Porras, D., Yu, B., Tian, H., Luo, B., Lin, S.,  
 167 Lewis, G. T., Craft, E., & Zhang, K. (2022). Chemical explosion, COVID-19, and environmental  
 168 justice: Insights from low-cost air quality sensors. *Science of The Total Environment*, 849, 157881.

169 <https://doi.org/10.1016/j.scitotenv.2022.157881>

170 Meyer, M., Afshar-Mohajer, N., Cross, E., & Mudgett, P. (2022). *Feasibility of using Low-Cost COTS Sensors*  
 171 *for Particulate Monitoring in Space Missions*. <https://ttu-ir.tdl.org/handle/2346/89764>

172 Miech, J. A., Stanton, L., Gao, M., Micalizzi, P., Uebelherr, J., Herckes, P., & Fraser, M. P. (2021). Calibration



173 of Low-Cost NO<sub>2</sub> Sensors through Environmental Factor Correction. *Toxics*, 9(11), Article 11.  
174 <https://doi.org/10.3390/toxics9110281>

175 Myklebust, H., Aarhaug, T. A., & Tranell, G. (2022). Use of a Distributed Micro-sensor System for Monitoring  
176 the Indoor Particulate Matter Concentration in the Atmosphere of Ferroalloy Production Plants. *JOM*,  
177 74(12), 4787–4797. <https://doi.org/10.1007/s11837-022-05487-7>

178 *Oizom—Polludrone Smart*. (n.d.). Retrieved 27 January 2023, from [http://www.aqmd.gov/aq-](http://www.aqmd.gov/aq-spec/sensordetail/oizom---polludrone-smart)  
179 [spec/sensordetail/oizom---polludrone-smart](http://www.aqmd.gov/aq-spec/sensordetail/oizom---polludrone-smart)

180 Ouimette, J. R., Malm, W. C., Schichtel, B. A., Sheridan, P. J., Andrews, E., Ogren, J. A., & Arnott, W. P.  
181 (2022). Evaluating the PurpleAir monitor as an aerosol light scattering instrument. *Atmospheric*  
182 *Measurement Techniques*, 15(3), 655–676. <https://doi.org/10.5194/amt-15-655-2022>

183 Puttaswamy, N., Sreekanth, V., Pillarisetti, A., Upadhya, A. R., Saidam, S., Veerappan, B., Mukhopadhyay, K.,  
184 Sambandam, S., Sutaria, R., & Balakrishnan, K. (2022). Indoor and Ambient Air Pollution in Chennai,  
185 India during COVID-19 Lockdown: An Affordable Sensors Study. *Aerosol and Air Quality Research*,  
186 22(1), 210170. <https://doi.org/10.4209/aaqr.210170>

187 Weissert, L. F., Alberti, K., Miskell, G., Pattinson, W., Salmund, J. A., Henshaw, G., & Williams, D. E. (2019).  
188 Low-cost sensors and microscale land use regression: Data fusion to resolve air quality variations with  
189 high spatial and temporal resolution. *Atmospheric Environment*, 213, 285–295.  
190 <https://doi.org/10.1016/j.atmosenv.2019.06.019>

191 Westgate, S., & Ng, N. L. (2022). Using in-situ CO<sub>2</sub>, PM<sub>1</sub>, PM<sub>2.5</sub>, and PM<sub>10</sub> measurements to assess air  
192 change rates and indoor aerosol dynamics. *Building and Environment*, 224, 109559.  
193 <https://doi.org/10.1016/j.buildenv.2022.109559>

194 Zauli-Sajani, S., Marchesi, S., Boselli, G., Broglia, E., Angella, A., Maestri, E., Marmioli, N., & Colacci, A.  
195 (2022). Effectiveness of a Protocol to Reduce Children’s Exposure to Particulate Matter and NO<sub>2</sub> in  
196 Schools during Alert Days. *International Journal of Environmental Research and Public Health*,  
197 19(17), Article 17. <https://doi.org/10.3390/ijerph191711019>
